# Supplementary material
Source: publisher figshare collection journal article supplement (https://tandf.figshare.com/ndownloader/files/17544443)
Supplement: Supplementary file 1 [file 17544443]

**Supplementary material**

**Supplementary Table 1.** Effect of different doses of AGs on the state of test animals.

**Supplementary Table 2.** Effect of AGs in rats under acute immobilization stress.

**Supplementary Table 3.** Effect of AGs in stress gastric lesions.

**Supplementary Table 4.** Effect of AGs in organ indexes of non-stressed rats.

**Supplementary Figure 1.** СА3 hippocampus region in rats subjected to restraint stress and received AGs.

Supplementary Table 1

**А**

**В**

**С**

*Effect of different doses of AGs on the state of test animals*

| Group  Values | Control | | AGs 15 mg/kg | | AGs 157 mg/kg | | K | Kruskal-Wallis test |
| --- | --- | --- | --- | --- | --- | --- | --- | --- |
| Ме | 2 –75 % | Ме | 25–75 % | Ме | 25–75 % |
| **catalase activity** (mmol/(min.*l)) | 0.4355 | 0.4268-0.5705 | 0.5206 | 0.2603-0.7877 | 0.554 | 0.491- 0.604 | 0.14 |  |
| **malonic dialdehyde** (μmol/l) | 94.23 | 91.82-98.8 | 100.96 | 93.03-103.6 | 101.68 | 92.55-109.6 | 0.25 |  |
| **hemoglobin** (g/l) | 87.96 | 85.27-90.64 | 88.49 | 86.34-91.7 | 91.17 | 87.9 -100.29 | 0.25 |  |
| **body weight** (g) | 287.0 | 279.0-298.0 | 291.0 | 282.5-303.5 | 271.0 | 261.0–272.0 | -0.53* | Н = 13.9; df = 2; р = 0.001 |
| **hippocampus CA3 cells number** | 15.0 | 15.0-17.3 | 14.7 | 13.3-17.7 | 16.0 | 15.0-16.3 | 0.03 |  |

K – Kendall correlation coefficient; * - significant value, р < 0.025;

Me – median, df – degrees of freedom.

Supplementary Table 2

*Effect of AGs in rats under acute immobilization stress*

| Group  Values | control | | stress control | | AGs 15 mg/kg | | AGs 157 mg/kg | | K | Kruskal-Wallis test |
| --- | --- | --- | --- | --- | --- | --- | --- | --- | --- | --- |
| Ме | 2 –75 % | Ме | 25–75 % | Ме | 25–75 % | Ме | 25–75 % |
| **catalase activity** (mmol/(min.*l)) | 0.4355 | 0.427-0.571 | 0.2535 | 0.219-0.288 | 0.3955 | 0.313-0.438 | 0.806 | 0.699-0.852 | 0.78* | Н = 12.93; df = 5; р = 0.024 |
| **malonic dialdehyde** (μmol/l) | 94.23 | 91.82-98.80 | 93.03 | 91.82-94.23 | 91.34 | 86.78-93.51 | 94.23 | 88.94-96.63 | 0.07 | Н = 4.03; df=5; р = 0.54 |
| **hemoglobin** (g/l) | 87.96 | 85.27-90.64 | 79.23 | 76.05-82.40 | 77.98 | 75.86-80.10 | 81.55 | 75.93-81.55 | 0.04 | Н = 12.12; df=5; р = 0.03 |
| **body weight (g)** | 287.0 | 279.0-298.0 | 298.0 | 279.0-312.0 | 298.0 | 279.5-306.5 | 261.0 | 260.0-263.0 |  |  |
| **spleen weight** (g) |  |  | 0.49 | 0.48-0.50 | 0.58 | 0.49-0.65 | 0.46 | 0.42-0.48 | -0.18 |  |
| **spleen index (%)** |  |  | 0.161 | 0.160-0.176 | 0.189 | 0.170-0.216 | 0.176 | 0.160-0.199 | 0.13 | Н = 0.84; df=2; р = 0.66 |
| **weight of** **adrenal glands** (g) |  |  | 0.06 | 0.05-0.06 | 0.075 | 0.06-0.08 | 0.09 | 0.07-0.12 | 0.58* |  |
| **adrenal gland** **index (%)** |  |  | 0.019 | 0.017-0.022 | 0.025 | 0.022-0.026 | 0.034 | 0.027-0.044 | 0.81* | Н = 9.08; df=2 р = 0.01 |
| **thymus weight** (g) |  |  | 0.22 | 0.22-0.26 | 0.23 | 0.21-0.27 | 0.23 | 0.21-0.23 | -0.15 |  |
| **thymus index (%)** |  |  | 0.079 | 0.074-0.083 | 0.081 | 0.075-0.088 | 0.085 | 0.080-0.095 | 0.27 | Н = 1.25; df=2; р = 0.53 |
| **hippocampus CA3 cells number** | 15.0 | 15.0-17.3 | 17.7 | 13.8-18.6 | 15.4 | 13.0-17.8 | 17.4 | 16.3-18.9 | 0.03 | Н = 3.16; df=5; р = 0.68 |

K – Kendall correlation coefficient; * - significant value, р < 0.025;

Me – median, df – degrees of freedom

Supplementary Table 3

*Effect of AGs in stress gastric lesions*

| Group | **number of lesions in a group** | | **The number of animals with lesions (%)** | **The number of animals with different type of lesions (%)** | |
| --- | --- | --- | --- | --- | --- |
|  | Ме | 25–75 % | **spot** | **linear** |
| stress control | 3.0* | 1.0-4.0 | 100 | 100** | 66** |
| stress AGs 15 mg/kg | 0.0 | 0.0-0.5 | 25 | 100 | 0 |
| stress AGs 157 mg/kg | 0.0 | 0.0-1.0 | 40 | 100 | 0 |

*K = -0.64; Z = 2.03, p = 0.036

K – Kendall correlation coefficient; * - significant value, (р < 0.025 for correlation);

Z - Mann-Whitney U test – we compared only stressed animals with animals previously treated AGs;

** - in the stress control group, ulcers were detected in all tested animals, stomach spot lesions were found in 100% of animals in this group, 66% animals had also linear ulcers

Supplementary Table 4

*Effect of AGs in organ indexes of non-stressed rats*

| Group  Values | control | | AGs 15 mg/kg | | AGs 157 mg/kg | | Kruskal-Wallis test |
| --- | --- | --- | --- | --- | --- | --- | --- |
| Ме | 25–75 % | Ме | 25–75 % | Ме | 25–75 % |
| **body weight** (g) | 285 | 280.5-291 | 287.5 | 282.5-296.5 | 273 | 272-275.5 |  |
| **spleen weight** (g) | 0.60 | 0.60-0.62 | 0.76 | 0.74-0.8 | 0.64 | 0.63-0.68 | H= 9.53; df=2; p=0.0085 |
| **spleen index (%)** | 0.2125 | 0.206-0.219 | 0.269 | 0.253-0.28 | 0.235 | 0.229-0.249 | H= 9.04; df=2; p=0.011 |
| **weight of** **adrenal glands** (g) | 0.075 | 0.06-0.08 | 0.065 | 0.05-0.085 | 0.06 | 0.05-0.08 | H= 0.16; df=2; p=0.92 |
| **adrenal gland** **index (%)** | 0.026 | 0.021-0.029 | 0.023 | 0.017-0.03 | 0.022 | 0.018-0.0295 | H= 0.27; df=2; p=0.87 |
| **thymus weight** (g) | 0.24 | 0.2-0.3 | 0.27 | 0.245-0.31 | 0.265 | 0.24-0.305 | H= 0.96; df=2; p=0.62 |
| **thymus index (%)** | 0.085 | 0.072-0.103 | 0.096 | 0.085-0.106 | 0.0975 | 0.0885-0.111 | H= 1.19; df=2; p=0.55 |

K – Kendall correlation coefficient; * - significant value, р < 0.025;

Me – median, df – degrees of freedom

Supplementary Figure 1

*СА3 hippocampus region in rats subjected to restraint stress and received AGs*


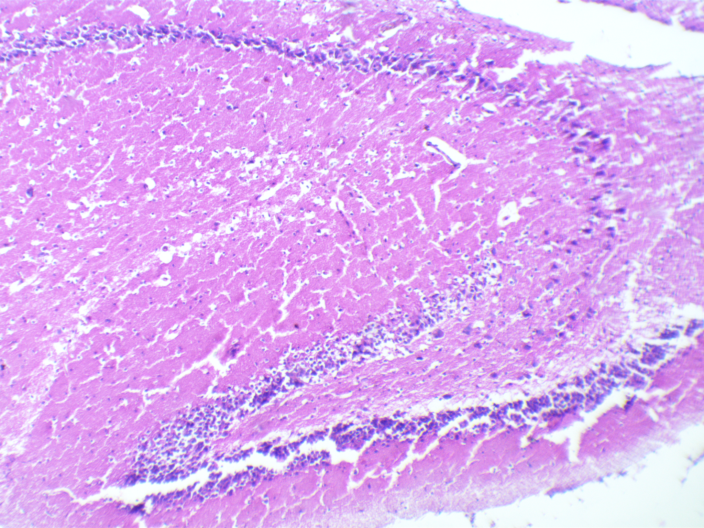


**А**


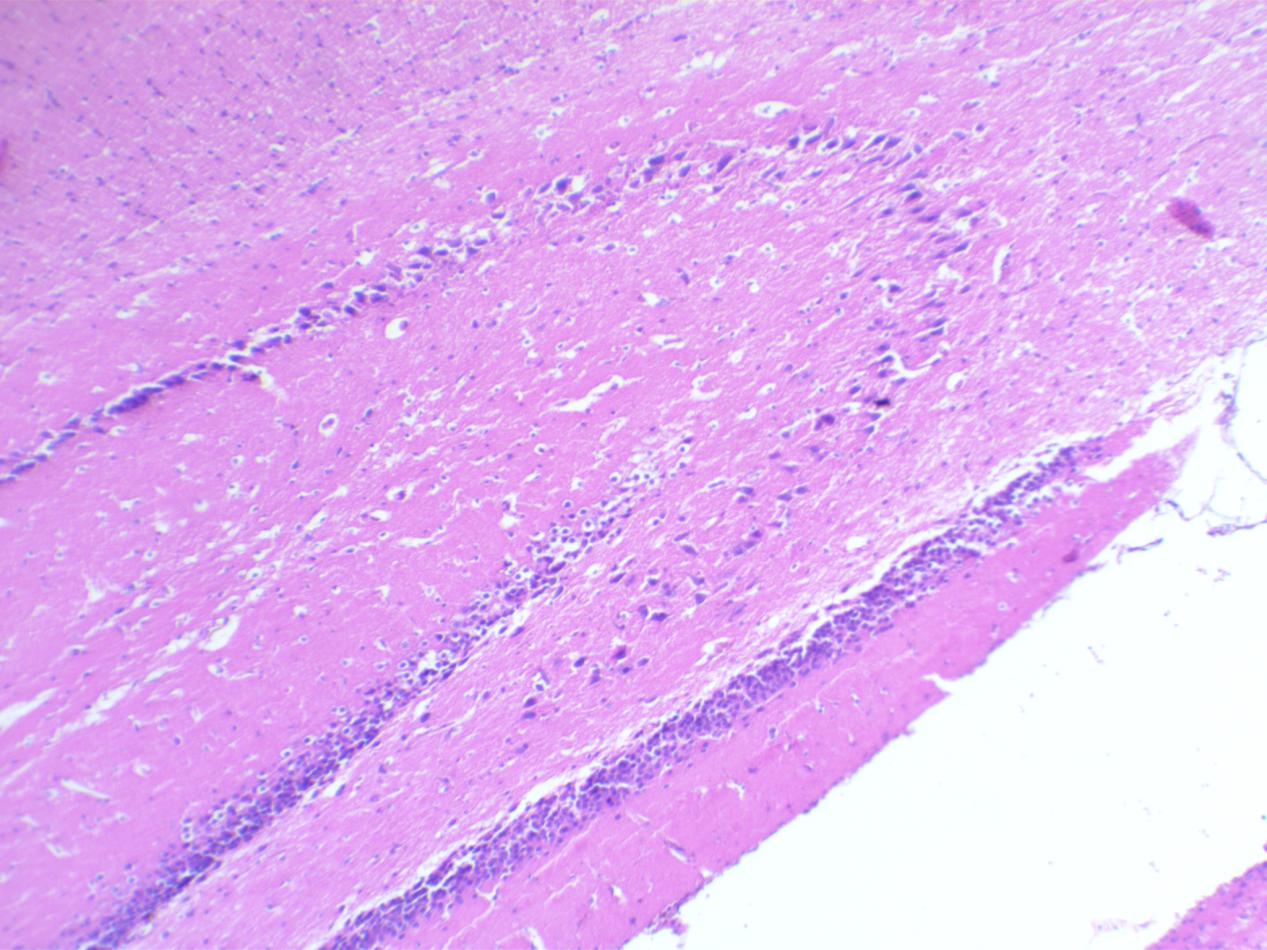


**В**


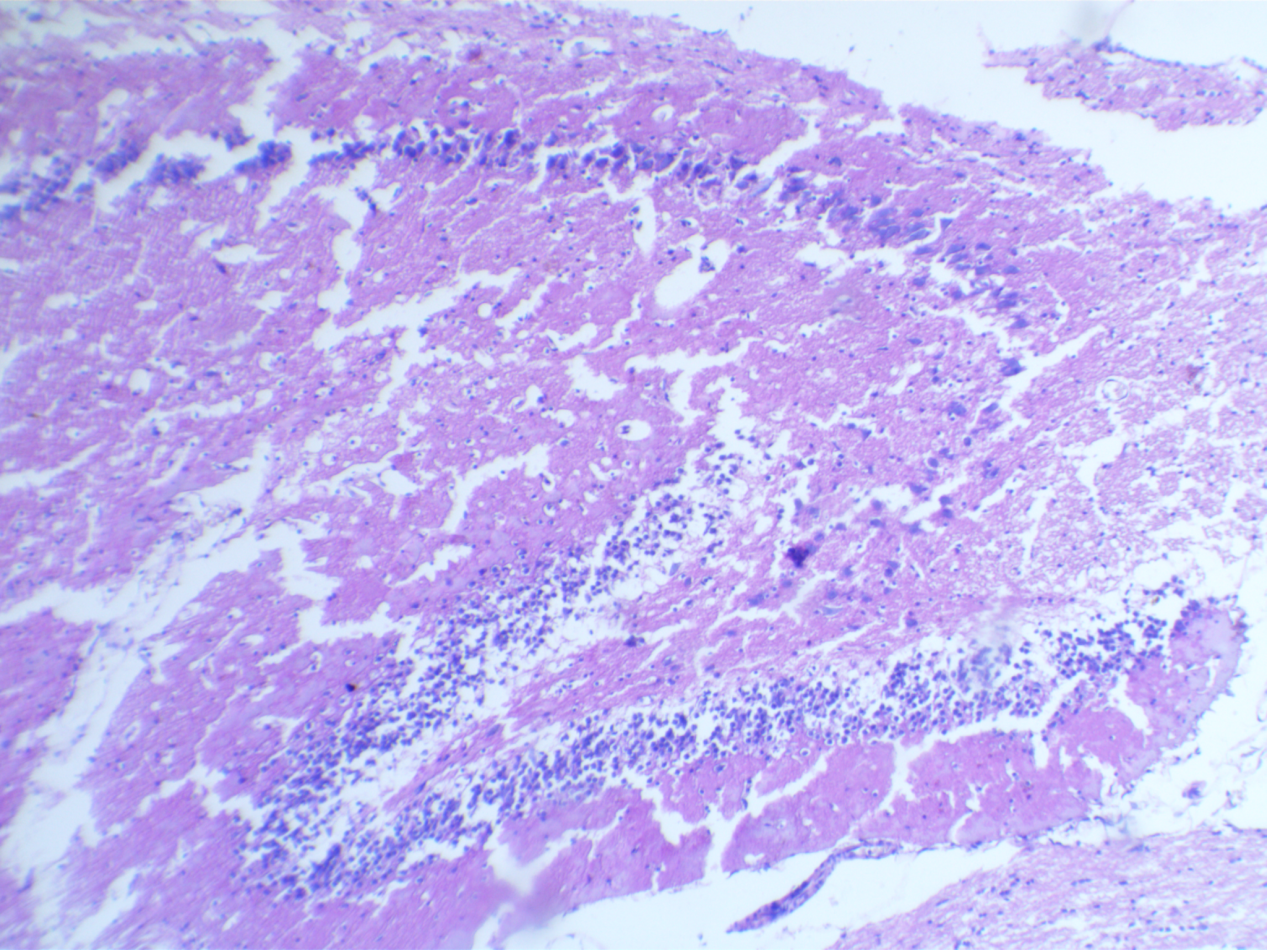


**С**

The number of cells in the CA3 region of hippocampus did not significantly depend either or on the dose of the AG preparation. Kruskal-Wallis test values are Н = 3.16; р = 0.68. However, changes in cells numbers were observed in some animals.

A). Hypocampus. Area CA3. Stress-control group. Microphoto, magnif. × 100. A zone with a reduced number of neurons indicated by an arrow.

B). Hypocampus Area CA3. Stress group received AGs at a dose of 15 mg/kg. Microphoto, magnif. × 100. The average number of cells is reduced.

C). Hypocampus Area CA3. Control. Microphoto, magnif. × 100.
